# Supplementary material for: Assessment of Bacterial Communities Associated With the Skin of Costa Rican Amphibians at La Selva Biological Station
Source: Front Microbiol. 2018 Sep 3;9:2001. doi: 10.3389/fmicb.2018.02001 (PMC6129598; doi:10.3389/fmicb.2018.02001)
Supplement: Supplementary file 3 [file Table_3.xlsx]

## Sheet: CR_USA 
Supplementary Table 3. Shannon and PD_whole_tree alpha diversity indexes from Costa Rica, California and Virginia amphibian samples (7800 rarification)
#SampleID	shannon	PD_whole_tree	Host_species	Region
AL.Exp.P8D0.638170	7.78984	30.662	Plethodon cinereus	Virginia
AL.Exp.P9D0.638194	7.59888	29.5038	Plethodon cinereus	Virginia
AL.Exp.P6D0.638083	5.21121	6.01376	Plethodon cinereus	Virginia
AL.Exp.P15D0.638137	7.65136	30.1246	Plethodon cinereus	Virginia
AL.Exp.P2D0.638177	8.23715	37.344	Plethodon cinereus	Virginia
AL.Exp.P12D0.638092	3.20123	30.404	Plethodon cinereus	Virginia
AL.Exp.P14D0.638079	7.86102	32.3808	Plethodon cinereus	Virginia
AL.Exp.P17D0.638150	8.06899	35.088	Plethodon cinereus	Virginia
AL.Exp.P16D0.638197	4.1741	26.2153	Plethodon cinereus	Virginia
AL.Exp.P1D0.638041	6.98415	35.2156	Plethodon cinereus	Virginia
AL.Exp.P7D0.638087	7.73725	34.5998	Plethodon cinereus	Virginia
AL.Exp.P4D0.638132	8.0396	46.5496	Plethodon cinereus	Virginia
AL.Exp.P19D0.638074	7.46189	31.8097	Plethodon cinereus	Virginia
AL.Exp.P3D0.638142	8.47574	46.4368	Plethodon cinereus	Virginia
AL.Exp.P11D0.638165	8.29128	54.1698	Plethodon cinereus	Virginia
AL.Exp.P13D0.638057	7.86349	40.735	Plethodon cinereus	Virginia
AL.Exp.P5D0.638187	8.51481	51.2309	Plethodon cinereus	Virginia
AL.Exp.P20D0.638221	8.00731	33.2774	Plethodon cinereus	Virginia
AL.Exp.P18D0.638042	8.27326	39.7221	Plethodon cinereus	Virginia
AL.Exp.P10D0.638200	7.64747	29.8347	Plethodon cinereus	Virginia
AC181	2.60628	43.9374	Agalychnis callidryas	Costa Rica
AC182	6.79216	39.3889	Agalychnis callidryas	Costa Rica
AC183	6.89874	43.5189	Agalychnis callidryas	Costa Rica
AC184	6.61959	26.355	Agalychnis callidryas	Costa Rica
CB181	9.01308	116.549	Craugastor bransfordii	Costa Rica
CB182	7.32021	64.108	Craugastor bransfordii	Costa Rica
CB183	8.34372	67.8451	Craugastor bransfordii	Costa Rica
CB184	8.89947	99.4847	Craugastor bransfordii	Costa Rica
CB185	6.18063	53.6078	Craugastor bransfordii	Costa Rica
CF181	6.67062	31.5929	Craugastor fitzingeri	Costa Rica
CF1810	6.8838	69.1307	Craugastor fitzingeri	Costa Rica
CF182	4.03882	82.2955	Craugastor fitzingeri	Costa Rica
CF183	9.19727	149.774	Craugastor fitzingeri	Costa Rica
CF184	6.00619	69.1093	Craugastor fitzingeri	Costa Rica
CF185	8.53291	111.503	Craugastor fitzingeri	Costa Rica
CF186	7.10694	72.681	Craugastor fitzingeri	Costa Rica
CF187	8.76178	86.9959	Craugastor fitzingeri	Costa Rica
CF188	7.30379	105.103	Craugastor fitzingeri	Costa Rica
CF189	5.9483	44.1202	Craugastor fitzingeri	Costa Rica
CM181	7.47197	43.6713	Craugastor megacephalus	Costa Rica
CM182	9.21156	155.838	Craugastor megacephalus	Costa Rica
DD181	1.58479	12.6849	Diasporus diastema	Costa Rica
DD182	1.79838	29.919	Diasporus diastema	Costa Rica
DP191	7.20233	68.8303	Oophaga pumilio	Costa Rica
DP192	8.23681	94.8306	Oophaga pumilio	Costa Rica
DP193	9.22813	137.247	Oophaga pumilio	Costa Rica
DP194	5.03154	46.1169	Oophaga pumilio	Costa Rica
DP195	6.98831	62.3697	Oophaga pumilio	Costa Rica
DP196	8.92944	106.3	Oophaga pumilio	Costa Rica
GP181	2.33199	31.2276	Hypopachus pictiventris	Costa Rica
GP182	1.31214	42.3201	Hypopachus pictiventris	Costa Rica
JK10.961388	4.23353	32.2364	Anaxyrus boreas	California
JK102.961389	7.67082	45.3205	Pseudacris regilla	California
JK103.961375	7.71323	53.396	Pseudacris regilla	California
JK104.961269	7.94876	75.4433	Pseudacris regilla	California
JK105.961210	7.77733	56.1032	Pseudacris regilla	California
JK106.961253	7.12575	34.3246	Pseudacris regilla	California
JK107.961313	5.9509	18.0835	Pseudacris regilla	California
JK109.961426	7.21698	38.2903	Anaxyrus boreas	California
JK11.961373	6.53996	77.2322	Anaxyrus boreas	California
JK110.961479	4.9552	25.2212	Anaxyrus boreas	California
JK111.961229	4.37857	54.4574	Anaxyrus boreas	California
JK112.961481	6.3259	69.281	Anaxyrus boreas	California
JK113.961449	5.32554	50.8115	Anaxyrus boreas	California
JK114.961306	4.93091	61.7331	Anaxyrus boreas	California
JK115.961226	5.71883	54.389	Anaxyrus boreas	California
JK116.961368	7.81795	81.2143	Anaxyrus boreas	California
JK117.961369	7.10964	93.6188	Anaxyrus boreas	California
JK12.961391	4.40691	33.1461	Anaxyrus boreas	California
JK13.961434	2.4708	12.5261	Pseudacris regilla	California
JK131.961377	2.59503	16.2802	Pseudacris regilla	California
JK133.961371	5.73686	27.0641	Pseudacris regilla	California
JK134.961446	6.88905	34.2433	Pseudacris regilla	California
JK136.961403	4.91438	21.0394	Pseudacris regilla	California
JK139.961224	5.12933	58.078	Anaxyrus boreas	California
JK14.961332	1.70083	11.841	Pseudacris regilla	California
JK140.961256	6.35757	65.1522	Anaxyrus boreas	California
JK141.961255	6.63367	65.187	Anaxyrus boreas	California
JK142.961428	5.51427	46.6603	Anaxyrus boreas	California
JK143.961412	5.16039	54.3568	Anaxyrus boreas	California
JK144.961384	4.06788	31.8956	Anaxyrus boreas	California
JK145.961487	5.89218	58.564	Anaxyrus boreas	California
JK146.961470	4.97454	63.638	Anaxyrus boreas	California
JK15.961219	2.10622	10.4019	Pseudacris regilla	California
JK151.961220	4.50029	38.0806	Anaxyrus boreas	California
JK152.961304	3.2664	21.2582	Anaxyrus boreas	California
JK153.961263	4.1253	40.8856	Anaxyrus boreas	California
JK154.961309	5.0376	49.3072	Anaxyrus boreas	California
JK155.961299	3.93503	40.4822	Anaxyrus boreas	California
JK156.961337	4.7223	41.6202	Anaxyrus boreas	California
JK157.961341	4.98793	38.501	Anaxyrus boreas	California
JK16.961462	4.51533	22.841	Pseudacris regilla	California
JK160.961258	6.53871	31.7499	Pseudacris regilla	California
JK161.961242	7.85993	57.6423	Pseudacris regilla	California
JK162.961495	6.26463	27.1527	Pseudacris regilla	California
JK163.961356	5.85298	47.91	Pseudacris regilla	California
JK164.961237	6.00206	27.1305	Pseudacris regilla	California
JK165.961225	7.15624	56.7516	Pseudacris regilla	California
JK166.961374	6.48149	30.2489	Pseudacris regilla	California
JK17.961297	4.92431	16.8588	Pseudacris regilla	California
JK170.961482	3.93932	28.9106	Rana cascadae	California
JK171.961265	2.85384	28.7974	Rana cascadae	California
JK172.961352	3.16447	27.8837	Rana cascadae	California
JK173.961349	4.71153	60.6035	Rana cascadae	California
JK174.961284	3.14527	28.434	Rana cascadae	California
JK175.961478	4.71615	54.9308	Anaxyrus boreas	California
JK176.961231	6.94218	78.0361	Anaxyrus boreas	California
JK177.961367	4.52272	66.2852	Anaxyrus boreas	California
JK178.961300	4.50029	52.9775	Anaxyrus boreas	California
JK179.961211	3.22948	33.1386	Rana cascadae	California
JK18.961437	2.83194	15.9608	Pseudacris regilla	California
JK180.961235	1.73279	21.0748	Rana cascadae	California
JK181.961420	2.42126	17.5213	Rana cascadae	California
JK182.961468	1.26851	22.2658	Rana cascadae	California
JK183.961480	5.46632	32.7672	Rana cascadae	California
JK184.961424	2.54254	27.0268	Rana cascadae	California
JK185.961272	6.99695	36.6377	Pseudacris regilla	California
JK19.961286	2.38432	22.7283	Pseudacris regilla	California
JK20.961444	0.991308	8.61781	Pseudacris regilla	California
JK206.961485	6.21733	20.9186	Pseudacris regilla	California
JK207.961261	6.13168	29.6567	Pseudacris regilla	California
JK208.961402	6.40705	25.1022	Pseudacris regilla	California
JK209.961365	5.31715	24.7425	Pseudacris regilla	California
JK210.961288	5.10494	29.2631	Pseudacris regilla	California
JK211.961276	4.05848	22.2834	Rana cascadae	California
JK212.961259	2.94949	19.0658	Rana cascadae	California
JK213.961427	2.3071	23.6511	Rana cascadae	California
JK214.961301	5.78264	43.7009	Rana cascadae	California
JK215.961333	7.25515	55.7192	Rana cascadae	California
JK232.961410	5.71318	59.2089	Anaxyrus boreas	California
JK233.961390	4.96867	60.0588	Anaxyrus boreas	California
JK234.961408	6.92462	70.4018	Rana cascadae	California
JK235.961338	6.26808	94.509	Rana cascadae	California
JK236.961380	2.86912	33.7332	Rana cascadae	California
JK237.961392	3.50593	32.8249	Rana cascadae	California
JK238.961277	3.03576	20.7682	Rana cascadae	California
JK239.961216	3.3932	21.5301	Rana cascadae	California
JK240.961350	6.22898	23.6999	Rana cascadae	California
JK241.961472	6.78007	53.93	Rana cascadae	California
JK242.961425	4.77815	23.8165	Rana cascadae	California
JK243.961273	2.59968	19.0064	Rana cascadae	California
JK247.961245	3.60412	46.0469	Anaxyrus boreas	California
JK250.961473	5.17511	25.3571	Rana cascadae	California
JK251.961393	3.59707	27.5769	Rana cascadae	California
JK252.961439	4.62195	31.1071	Rana cascadae	California
JK264.961379	2.78711	11.7312	Rana cascadae	California
JK265.961251	3.9423	31.1639	Rana cascadae	California
JK266.961467	1.8987	16.8872	Rana cascadae	California
JK267.961441	5.47388	26.8656	Rana cascadae	California
JK268.961418	3.80558	28.2835	Rana cascadae	California
JK269.961223	2.43241	21.054	Rana cascadae	California
JK270.961302	2.71158	19.9131	Rana cascadae	California
JK271.961221	1.77191	11.8438	Rana cascadae	California
JK272.961489	4.91356	20.2902	Rana cascadae	California
JK273.961416	4.565	46.6467	Rana cascadae	California
JK274.961364	1.81114	12.7358	Rana cascadae	California
JK275.961322	2.94148	23.4657	Rana cascadae	California
JK277.961314	3.04268	15.1287	Rana cascadae	California
JK278.961450	3.67601	15.4094	Rana cascadae	California
JK279.961319	5.2219	40.9588	Rana cascadae	California
JK280.961250	2.28217	7.36151	Rana cascadae	California
JK295.961339	3.26198	12.0514	Rana cascadae	California
JK296.961247	3.81689	19.8283	Rana cascadae	California
JK297.961294	3.52967	37.381	Rana cascadae	California
JK298.961496	2.60737	30.4857	Rana cascadae	California
JK307.961411	5.89663	20.3784	Rana cascadae	California
JK308.961318	8.30266	58.5578	Rana cascadae	California
JK309.961296	5.95171	22.226	Rana cascadae	California
JK310.961238	6.70126	29.1317	Rana cascadae	California
JK321.961252	2.36388	24.7507	Rana cascadae	California
JK323.961417	5.93999	43.5124	Rana cascadae	California
JK324.961363	5.66535	54.216	Rana cascadae	California
JK325.961267	6.21715	54.4174	Rana cascadae	California
JK335.961228	4.47603	16.2791	Rana cascadae	California
JK336.961293	3.8698	17.4799	Rana cascadae	California
JK337.961415	3.28859	17.0292	Rana cascadae	California
JK338.961287	2.68069	19.3007	Rana cascadae	California
JK339.961328	5.68129	22.9933	Rana cascadae	California
JK340.961212	4.35666	15.7783	Rana cascadae	California
JK341.961347	5.7784	25.1916	Rana cascadae	California
JK342.961405	2.92565	18.6468	Rana cascadae	California
JK343.961249	4.58849	14.5035	Rana cascadae	California
JK344.961491	4.36534	21.2862	Rana cascadae	California
JK346.961351	3.60295	20.4029	Rana cascadae	California
JK347.961360	2.80724	19.8838	Rana cascadae	California
JK348.961395	3.42192	9.36698	Rana cascadae	California
JK349.961455	6.32361	31.7403	Rana cascadae	California
JK350.961330	5.21587	31.97	Rana cascadae	California
JK351.961353	4.73212	21.2406	Rana cascadae	California
JK352.961274	3.27668	16.9666	Rana cascadae	California
JK354.961404	5.52796	15.5588	Rana cascadae	California
JK356.961452	6.62009	35.5507	Rana cascadae	California
JK357.961275	5.16462	27.186	Rana cascadae	California
JK358.961460	6.22148	33.3399	Rana cascadae	California
JK359.961429	2.1351	21.1476	Rana cascadae	California
JK360.961227	2.54993	15.0574	Rana cascadae	California
JK361.961323	7.10055	35.8957	Rana cascadae	California
JK362.961469	1.76227	17.1896	Taricha torosa	California
JK365.961240	7.15217	68.3166	Rana cascadae	California
JK366.961327	6.93926	27.4511	Rana cascadae	California
JK367.961279	3.7913	44.2054	Rana cascadae	California
JK368.961359	8.3814	100.932	Rana cascadae	California
JK378.961213	2.82551	26.4791	Rana cascadae	California
JK379.961336	3.41459	25.2553	Rana cascadae	California
JK380.961432	5.73806	45.0743	Rana cascadae	California
JK4.961335	4.74012	66.2826	Lithobates catesbeianus	California
JK42.961463	4.56453	40.2082	Anaxyrus boreas	California
JK43.961295	6.36624	64.6891	Anaxyrus boreas	California
JK44.961312	5.49847	51.1639	Anaxyrus boreas	California
JK45.961321	5.81757	60.692	Anaxyrus boreas	California
JK46.961401	7.13756	74.7208	Anaxyrus boreas	California
JK47.961442	6.65483	66.3671	Anaxyrus boreas	California
JK48.961459	9.74441	128.065	Anaxyrus boreas	California
JK49.961230	6.04843	59.4623	Anaxyrus boreas	California
JK5.961316	3.89665	33.53	Anaxyrus boreas	California
JK63.961421	5.23534	51.5709	Anaxyrus boreas	California
JK64.961366	6.40122	49.7891	Anaxyrus boreas	California
JK65.961474	4.19068	26.2467	Anaxyrus boreas	California
JK66.961385	5.24074	48.9838	Anaxyrus boreas	California
JK67.961414	5.69323	55.308	Anaxyrus boreas	California
JK68.961431	7.8288	74.0065	Anaxyrus boreas	California
JK69.961381	4.79404	41.9286	Anaxyrus boreas	California
JK7.961362	4.49404	37.5393	Anaxyrus boreas	California
JK70.961354	6.94795	60.7516	Anaxyrus boreas	California
JK75.961305	5.89767	30.5396	Pseudacris regilla	California
JK76.961334	4.23086	31.0317	Pseudacris regilla	California
JK77.961320	4.79794	23.589	Pseudacris regilla	California
JK8.961486	3.95321	44.4524	Anaxyrus boreas	California
JK9.961456	6.79338	65.4164	Anaxyrus boreas	California
LS18	5.11207	67.8632	Leptodactylus savagei	Costa Rica
PR181	2.31683	20.6803	Pristimantis ridens	Costa Rica
PR182	4.70065	39.7599	Pristimantis ridens	Costa Rica
RH181	7.36873	87.7807	Rhaebo haematiticus	Costa Rica
RH1810	3.30154	19.301	Rhaebo haematiticus	Costa Rica
RH182	4.8064	15.4306	Rhaebo haematiticus	Costa Rica
RH183	8.33962	78.0999	Rhaebo haematiticus	Costa Rica
RH184	7.41787	139.013	Rhaebo haematiticus	Costa Rica
RH185	6.77027	86.4232	Rhaebo haematiticus	Costa Rica
RH186	7.87164	105.992	Rhaebo haematiticus	Costa Rica
RH187	8.5502	180.064	Rhaebo haematiticus	Costa Rica
RH188	6.61777	94.3393	Rhaebo haematiticus	Costa Rica
RH189	4.57807	82.7002	Rhaebo haematiticus	Costa Rica
RM181	4.30202	107.461	Rhinella horribilis	Costa Rica
SB18	7.66164	51.2733	Smilisca manisorum	Costa Rica
SMW454001	0.195139	10.9008	Oophaga pumilio	Costa Rica
SMW454002	9.05025	126.691	Oophaga pumilio	Costa Rica
SMW454003	8.59971	97.8498	Oophaga pumilio	Costa Rica
SMW454005	3.99275	59.1558	Oophaga pumilio	Costa Rica
SMW454006	6.14784	74.6571	Oophaga pumilio	Costa Rica
SMW454007	1.75176	43.9339	Oophaga pumilio	Costa Rica
SMW454008	6.28517	134.38	Oophaga pumilio	Costa Rica
SMW454009	5.37332	71.8221	Oophaga pumilio	Costa Rica
SMW454010	5.86387	31.6857	Oophaga pumilio	Costa Rica
SMW454011	6.64671	76.1085	Oophaga pumilio	Costa Rica
SMW454012	9.61594	135.811	Oophaga pumilio	Costa Rica
SMW454013	3.96882	65.8146	Oophaga pumilio	Costa Rica
SMW454014	2.55121	49.8278	Oophaga pumilio	Costa Rica
SMW454015	9.08833	130.695	Oophaga pumilio	Costa Rica
SMW454016	5.61682	39.6934	Oophaga pumilio	Costa Rica
SMW454017	7.60472	83.13	Oophaga pumilio	Costa Rica
SMW454018	3.29563	34.8006	Oophaga pumilio	Costa Rica
SMW454019	7.58295	67.3436	Oophaga pumilio	Costa Rica
SMW454020	7.16263	70.1619	Oophaga pumilio	Costa Rica
SMW454021	3.61053	71.6044	Oophaga pumilio	Costa Rica
